1 **Quantitative analysis of signaling responses during mouse**  
2 **primordial germ cell specification**

3 Sophie M. Morgani<sup>1\*</sup> and Anna-Katerina Hadjantonakis<sup>1\*</sup>

4

5 <sup>1</sup> Developmental Biology Program, Sloan Kettering Institute, Memorial Sloan Kettering Cancer  
6 Center, New York, NY, 10065, USA.

7

8 \*Corresponding authors:

9 Sophie M. Morgani, PhD and Anna-Katerina Hadjantonakis, PhD

10 Email: [morganis@mskcc.org](mailto:morganis@mskcc.org) , [hadj@mskcc.org](mailto:hadj@mskcc.org)

11

12

13 **Abstract**

14

15 During early mammalian development, the pluripotent cells of the embryo are exposed to a  
16 combination of signals that drive exit from pluripotency and germ layer differentiation. At the  
17 same time, a small population of pluripotent cells give rise to the primordial germ cells (PGCs),  
18 the precursors of the sperm and egg, which pass on heritable genetic information to the next  
19 generation. Despite the importance of PGCs, it remains unclear how they are first segregated  
20 from the soma, and if this involves distinct responses to their signaling environment. To  
21 investigate this question, we mapped BMP, MAPK and WNT signaling responses over time in  
22 PGCs and their surrounding niche *in vitro* and *in vivo* at single-cell resolution. We showed that,  
23 in the mouse embryo, early PGCs exhibit lower BMP and MAPK responses compared to  
24 neighboring extraembryonic mesoderm cells, suggesting the emergence of distinct signaling  
25 regulatory mechanisms in the germline versus soma. In contrast, PGCs and somatic cells  
26 responded comparably to WNT, indicating that this signal alone is not sufficient to promote  
27 somatic differentiation. Finally, we investigated the requirement of a BMP response for these  
28 cell fate decisions. We found that cell lines with a mutation in the BMP receptor (*Bmpr1a*<sup>-/-</sup>),  
29 which exhibit an impaired BMP signaling response, can efficiently generate PGC-like cells  
30 revealing that canonical BMP signaling is not cell autonomously required to direct PGC-like  
31 differentiation.

32

33

## 341. Introduction

35

36 Primordial germ cells (PGCs) are the embryonic precursors of the sperm and egg that are  
37 required to pass on heritable genetic information to the next generation. Defects in PGC  
38 production result in infertility while transformed or incorrectly positioned PGCs may give rise to  
39 germ cell tumors [1-4]. Thus, delineating the mechanisms that control PGC formation is critical  
40 to our understanding of both development and disease.

41

42 In mouse, PGCs emerge during early development at a time when the pluripotent cells of the  
43 embryo are exposed to a myriad of signals that drive cell fate specification. These signals direct  
44 the majority of cells to adopt somatic fates [5], while a small population of only around 40 cells  
45 repress the somatic program and instead become PGCs [6-8]. Despite the importance of these  
46 cells, it is unclear how distinct germline and soma identities emerge within a common signaling  
47 environment. Unlike somatic cells, PGCs express pluripotency-associated factors, including  
48 Oct4 (Pou5f1), Sox2, Nanog, Alkaline Phosphatase, and Ssea-1 [9] and demonstrate pluripotent  
49 properties, such as the capacity to give rise to self-renewing cell lines *in vitro*, and teratomas *in*  
50 *vivo* [10, 11]. This has led to the hypothesis suggesting that PGCs are the last cells of the  
51 embryo to differentiate [12], and thus may not initially respond to differentiation cues. Consistent  
52 with this notion, while emerging in a region of the embryo that is exposed to high levels of Bone  
53 Morphogenetic Protein (BMP) signaling factor, PGCs do not exhibit a BMP signaling response  
54 although their immediate somatic neighbors do [13, 14]. Nevertheless, we still know almost  
55 nothing about how PGCs respond to the other biochemical signals present within their  
56 environment in the embryo and how these responses change over time.

57

58 To address this, we systematically and quantitatively analyzed the response of individual PGCs  
59 and neighboring somatic niche cells to key signals present within the embryo during PGC  
60 specification. We confirmed that PGC-like cells (PGCLCs), generated from embryonic stem  
61 cells (ESCs) *in vitro*, and PGCs *in vivo* displayed significantly lower BMP signaling responses  
62 than non-PGCs. We found that early PGCs *in vivo* also show a diminished Mitogen-Activated  
63 Protein Kinase (MAPK) response, revealing PGC-specific modes of signaling regulation for  
64 multiple pathways. In contrast, PGCs responded to WNT comparably to somatic niche cells.  
65 Therefore, PGCs are not refractory to all signals within their environment and, in this context, in  
66 the absence of robust BMP and MAPK responses, WNT signaling is not sufficient to drive  
67 somatic differentiation in cells to be assigned a PGC fate.

68

69 Finally, while PGCs are devoid of a BMP signaling response, BMP is required for PGC  
70 specification [15-20], but its role and mechanism of action remain elusive. Here, we showed that  
71 ESCs with a mutation in the BMP receptor type Ia (*Bmpr1a*) gene, which are defective in their  
72 canonical BMP signaling response, can efficiently generate PGCLCs revealing that a robust  
73 canonical BMP response is neither required transiently at earlier stages of differentiation, or  
74 indirectly via the somatic niche for early PGC differentiation.

75

## 762. Methods

77

### 78 2.1 Cell culture and PGCLC *in vitro* differentiation

79

80 Cells were maintained at 37°C, at 5% CO<sub>2</sub> and 90% humidity. ESC lines were routinely cultured  
81 in serum/LIF medium (Dulbecco's modified Eagle's medium (DMEM) (Gibco, Gaithersburg, MD)  
82 containing 0.1 mM non-essential amino-acids (NEAA), 2 mM glutamine and 1 mM sodium  
83 pyruvate, 100 U/ml Penicillin, 100 µg/ml Streptomycin (all from Life Technologies, Carlsbad,  
84 CA), 0.1 mM 2-mercaptoethanol (Sigma, St. Louis, MO), and 10% Fetal Calf Serum (FCS,  
85 F2442, Sigma) and 1000 U/ml LIF on plates coated with 0.1 % gelatin, as described [21]. The  
86 following cell lines were used in this study: E14 (129/Ola background) [22], TCF/Lef:H2B-GFP  
87 [23], *Spry4*<sup>H2B-Venus</sup> [24], and *Bmpr1a*<sup>-/-</sup> [25].

88

89 *In vitro* PGC-like cell (PGCLC) differentiation was performed as described [26]. Briefly, ESCs  
90 were converted to an epiblast-like (EpiLC) state by 48 hour culture in N2B27 medium containing  
91 12 ng/ml FGF2 (233-FB-025, R&D Systems) and 20 ng/ml ACTIVIN A (120-14P, Peprotech,  
92 Rocky Hills, NJ) on dishes coated with 16.7 µg/mL fibronectin (FC010, Millipore). Following  
93 EpiLC conversion, cells were trypsinized to a single cell suspension and 10,000 cells/mL were  
94 resuspended in PGCLC medium, comprising GMEM (Gibco), 0.1 mM NEAA, 2 mM glutamine  
95 and 1 mM sodium pyruvate, 100 U/ml Penicillin, 100 µg/ml Streptomycin, 0.1 mM 2-  
96 mercaptoethanol, 1000 U/ml LIF, 15 % Knockout serum replacement, with 500 ng/ml BMP4,  
97 500 ng/ml BMP8a, 100 ng/ml SCF, and 50 ng/ml EGF (all from R&D Systems). Samples were  
98 collected for analysis at day 0 (EpiLC state), 2, 4 and 6 of differentiation.

99

### 100 2.2 Flow cytometry

101

102 Between 8-12 PGCLC aggregates per cell line/condition were pooled and then dissociated by  
103 incubation in TrpLE™ Select Enzyme (Thermo Fisher Scientific) at 37°C for approximately 2  
104 minutes. Following vigorous pipetting to form a single-cell suspension, the enzyme was  
105 neutralized with an equal volume of PGCLC medium without cytokines added. Cells were  
106 pelleted by centrifugation and then resuspended in 100 µL FACS buffer (PBS with 10 % FCS)  
107 with PE-conjugated anti-CD61 (RRID:AB\_313084, Biolegend, 104307, 1:200) and Alexa Fluor  
108 647-conjugated anti-SSEA1 (RRID:AB\_1210551, Thermo Fisher Scientific, 51-8813-73, 1:50)  
109 for 15 min on ice. Cells were then washed in 1 mL FACS buffer and resuspended in 200 µL  
110 FACS buffer containing 5 µg/ml Hoechst. Samples were analyzed using a BD LSR Fortessa™.  
111 Flow cytometry analysis was performed using FlowJo software (BD Biosciences). Cells were  
112 first separated from debris and cell doublets removed by gating on forward (FSC) and side  
113 scatter (SSC). Subsequently, dead cells were identified based on strong Hoechst staining and  
114 were excluded from further analysis. Gating for CD61, SSEA-1 positive cells was based on  
115 unstained wildtype E14 ESCs.

116

### 117 **2.3 Mouse lines**

118

119 Mice were housed under a 12 hr light-dark cycle in a pathogen-free room in the designated  
120 MSKCC facilities. For this study we used outbred CD1 animals maintained in accordance with  
121 the guidelines of the Memorial Sloan Kettering Cancer Center (MSKCC) Institutional Animal  
122 Care and Use Committee (IACUC). Natural mating was set up in the evening and mice were  
123 checked for copulation plugs the next morning. The date of vaginal plug was estimated as E0.5.  
124 For analysis of post-implantation stages of development, embryos were isolated from deciduae  
125 and Reichert's membrane removed by microdissection before further processing.

126

### 127 **2.4 Immunostaining**

128

129 Cell lines were immunostained as previously described [21]. Post-implantation embryos were  
130 washed in phosphate-buffered saline (PBS), then fixed in 4 % paraformaldehyde (PFA) for 15  
131 min at room temperature (RT). Embryos were washed in PBS plus 0.1 % Triton-X (PBST-T)  
132 followed by permeabilization for 30 min in PBS with 0.5 % Triton-X. Embryos were then washed  
133 in PBS-T and blocked overnight at 4 °C in PBS-T with 1 % bovine serum albumin (BSA, Sigma)  
134 and 5 % donkey serum (Sigma). The following day, embryos were transferred to the primary  
135 antibody solution (PBS-T with appropriate concentration of antibody) and incubated overnight at

136 4 °C. The following day, embryos were washed 3 x 10 min in PBS-T and transferred to blocking  
137 solution at RT for a minimum of 5 hr. Embryos were transferred to secondary antibody solution  
138 (PBS-T with 1:500 dilution of appropriate secondary conjugated antibody and 5  $\mu$ g/ml Hoechst)  
139 overnight at 4 °C. Embryos were washed 3 x 10 min in PBS-T.

140

141 The following primary antibodies were used in this study: AP2 $\gamma$  (RRID:AB\_667770,  
142 Santa Cruz, sc-12762, 1:100), phosphorylated SMAD1/5/9 (a gift from Dr. Edward Laufer,  
143 University of Utah School of Medicine), Sox2 (RRID:AB\_11219471, Thermo Fisher Scientific,  
144 14-9811-82, 1:200).

145

## 146 **2.5 Cryosectioning**

147

148 Following wholemount immunostaining and imaging, embryos were oriented as desired and  
149 embedded in Tissue-Tek® OCT (Sakura Finetek, Japan). Samples were frozen on dry ice for  
150 approximately 30 min and then maintained for short periods at  $-80^{\circ}\text{C}$  followed by  
151 cryosectioning using a Leica CM3050S cryostat. Transverse cryosections of 10  $\mu$ m thickness  
152 were cut with a Leica CM3050S cryostat and mounted on Colorfrost Plus® microscope slides  
153 (Fisher Scientific) using Fluoromount G (RRID:SCR\_015961, Southern Biotech, Birmingham,  
154 AL). Cryosections were then imaged using a confocal microscope as described.

155

## 156 **2.6 Quantitative image analysis**

157

158 Embryos were imaged on a Zeiss LSM880 laser scanning confocal microscope. Confocal z  
159 stacks of cells or embryo cryosections were generated. Raw data was then processed in  
160 ImageJ open source image processing software (Version: 2.0.0-rc-49/1.51d). Individual  
161 PGCLCs, identified by AP2 $\gamma$  expression, PGCs identified by SOX2 expression, or their  
162 surrounding AP2 $\gamma$ - SOX2- niche cells were randomly chosen and, using Fiji (ImageJ) software,  
163 selected by manually drawing a boundary around the nucleus. The mean fluorescence intensity  
164 of pSMAD1/5/9 immunostaining, *Spry4*<sup>H2B-Venus</sup>, or TCF/Lef:H2B-GFP reporter expression was  
165 then measured in arbitrary units. Fluorescence decay along the z-axis was corrected for each  
166 channel and sample by fitting a linear regression model to the logarithm of fluorescence values  
167 as a function of the z-value, and correcting the models' slopes using an empirical Bayes  
168 approach, as previously described [27]. For all quantification, statistical analysis of significance  
169 was assessed using a One-way ANOVA followed by unpaired *t*-tests to compare particular

170 groups (GraphPad Prism, GraphPad Software, Inc., Version 7.0a). For analysis performed on  
171 embryos, all PGCs were selected from 3 different cryosections through the allantois of 3 distinct  
172 embryos. Fluorescence values were then calculated relative to the average mean fluorescence  
173 of non-neighboring ('Other') AP2 $\gamma$ - SOX2- niche cells within each individual section in order to  
174 normalize for differences in immunostaining that may arise due to differences in permeability  
175 within different embryonic regions or different stages of development. Statistics were carried out  
176 on average fluorescence levels per embryo, rather than on a per cell basis.

177

## 1783. Results and discussion

179

### 180 3.1 Quantitative analysis of signaling responses during mouse PGCLC specification

181

182 Functional PGC-like cells (PGCLCs) can be generated *in vitro* from mouse embryonic stem cells  
183 (ESCs). First ESCs are converted to an epiblast-like cell (EpiLC) state, comparable to the  
184 pluripotent embryonic cells before germ layer differentiation. Subsequently, EpiLCs are  
185 aggregated in suspension culture and exposed to a combination of signals, mimicking those  
186 present in the embryo, that promote PGC specification, survival, and proliferation (Fig. 1A) [26].  
187 Using this protocol, we successfully generated PGCLCs, identified by the coexpression of SOX2  
188 and AP2 $\gamma$  (Fig. 1B), and the cell surface markers SSEA-1 and CD61 (Fig. 1C, D) [28]. PGCLC  
189 aggregates displayed widespread SOX2 expression while AP2 $\gamma$  was expressed in only a subset  
190 of cells, suggesting that the rate of PGCLC specification was variable across individual cells or  
191 that a mixture of cell fates were formed (Fig. 1B). Thus, we considered PGCLCs as cells that  
192 coexpressed SOX2 and AP2 $\gamma$  in our downstream analyses. Using this cell culture system, we  
193 then analyzed signaling responses in individual PGCLCs and surrounding non-PGCLCs.

194

195 BMP signaling plays a critical role in PGC specification. Mutations in the genes encoding *Bmp4*,  
196 *Bmp8*, and *Bmp2*, as well as the downstream effectors that mediate the BMP signaling  
197 response, *Smad1* and *Smad5*, result in a loss or significant reduction in PGC number [15-20].  
198 Nevertheless, neither PGCLCs *in vitro* nor PGCs *in vivo* exhibit a canonical BMP signaling  
199 response [13, 14], demonstrated by the absence of nuclear-localized phosphorylated  
200 SMAD1/5/9 (pSMAD1/5/9, SMAD9 is also known as SMAD8). However, BMP responses have  
201 not been systematically and quantitatively analyzed at single-cell resolution and therefore it is  
202 unclear whether a fraction of PGCs do respond or if a transient response may occur. To  
203 investigate this, we measured pSMAD1/5/9 levels in individual nuclei within PGCLC aggregates

204 at days 2, 4, and 6 of differentiation. We observed that AP2 $\gamma$ + PGCLCs displayed significantly  
205 lower levels of nuclear pSMAD1/5/9 than AP2 $\gamma$  negative (AP2 $\gamma$ -) non-PGCLCs (Fig. 1E, F).  
206 Indeed, we did not identify any PGCLCs with nuclear-localized pSMAD1/5/9 (Fig. 1E, F).  
207 Furthermore, while the BMP signaling response increased in AP2 $\gamma$ - non-PGCLCs over time, it  
208 remained low in PGCLCs (Fig. 1F). Thus, at this resolution, we observed no evidence for a  
209 subset of BMP-responsive PGCLCs.

210  
211 We then asked whether PGCLCs also lack responses to other critical signals present within the  
212 mouse embryo at this time. FGF is expressed within the posterior of the embryo at the time of  
213 PGC specification and is necessary for somatic germ layer specification, gastrulation EMT and  
214 concomitant cell migration [29-31]. Additionally, FGF and EGF, which both activate the MAPK  
215 pathway, are provided exogenously during PGCLC differentiation (Fig. 1A). In order to analyze  
216 the MAPK signaling response, we used a *Spry4*<sup>H2BVenus</sup> ESC line, which harbors a fluorescent  
217 reporter in the endogenous locus of *Sprouty4* (*Spry4*), an early target of the pathway [24]. We  
218 observed widespread Venus expression throughout PGCLC aggregates at all stages of  
219 differentiation (Fig. 2G). We then performed flow cytometry and quantitative  
220 immunofluorescence to determine how this response changed over time. In contrast to the  
221 gradually increasing BMP response in non-PGCLCs, there was a reduction in the MAPK  
222 response over time (Fig. 1H, I). Quantitative immunofluorescence revealed no significant  
223 difference in the MAPK signaling response in PGCLCs and non-PGCLCs (Fig. 1I). At each  
224 stage of differentiation, Venus levels were lower, although not significantly, in AP2 $\gamma$ + vs. AP2 $\gamma$ -  
225 cells (Fig. 1I).

226  
227 WNT signaling is required for both somatic [32-35] and germ cell [36, 37] fate specification.  
228 WNT drives the initial exit from pluripotency but a subset of its targets must subsequently be  
229 repressed in PGC-fated cells to prevent somatic differentiation [37]. Here we used a  
230 TCF/Lef:H2B-GFP reporter ESC line, that contains multimerized binding sites for the T cell-  
231 specific transcription factor/lymphoid enhancer-binding factor 1 (TCF/Lef) family of transcription  
232 factor coactivators, which mediate the WNT signaling response [23]. Although recombinant  
233 WNT is not added exogenously to the PGCLC differentiation medium, TCF/Lef:H2B-GFP was  
234 expressed heterogeneously throughout cell aggregates (Fig. 1J), signifying that endogenous  
235 WNT ligands were present. However, there was no difference in the WNT response in PGCLCs  
236 compared to non-PGCLCs revealing that PGCLCs are not refractory to all differentiation-  
237 inducing signals. The WNT response decreased during PGCLC differentiation (Fig. 1K, L).



238 Thus, initially PGCLCs show a reduced BMP signaling response and as differentiation  
239 proceeds, PGCLCs and non-PGCLCs also reduce their MAPK and WNT signaling responses.

240

### 241 **3.2 Quantitative analysis of signaling responses during PGC specification *in vivo***

242

243 The combination, dynamics, and dose of factors provided during PGCLC differentiation *in vitro*,  
244 may not precisely recapitulate the dynamic signaling environment within the embryo. Moreover,  
245 the majority of AP2 $\gamma$ - non-PGCLCs also expressed SOX2 (Fig. 1B), suggesting that they  
246 represent a pluripotent EpiLC state or earlier state of PGCLC differentiation, and thus do not  
247 mirror the *in vivo* PGC niche at the posterior of the embryo that comprises extraembryonic  
248 mesoderm. Therefore, we also sought to investigate signaling responses in PGCs and their  
249 niche in the embryo. We isolated and analyzed embryos at embryonic day (E) 7.25, when  
250 SOX2+ AP2 $\gamma$ + PGCs first emerge within a posteriorly-localized extraembryonic structure known  
251 as the allantois (Fig. 2A) [38], and at E7.75, when PGCs begin to exit the allantois and migrate  
252 anteriorly along the hindgut endoderm toward their eventual destination in the gonads. In  
253 contrast to PGCLC aggregates, where only a subset of SOX2+ cells expressed AP2 $\gamma$ , *in vivo*  
254 SOX2 and AP2 $\gamma$  expression fully overlapped (Fig. 2A). However, as AP2 $\gamma$  immunofluorescence  
255 resulted in high levels of non-specific background staining in the endoderm on the embryo's  
256 surface (Fig. 2A), we used SOX2 to accurately identify PGCs. We isolated wildtype embryos,  
257 which we immunostained for pSMAD1/5/9, as well as *Spry4*<sup>H2B-Venus</sup>, and TCF/Lef:H2B-GFP  
258 reporter embryos and measured signaling responses in individual SOX2+ PGCs, and SOX2-  
259 non-PGCs that were either adjacent to PGCs (categorized as 'Neighbors'), or non-adjacent  
260 (categorized as 'Other') in transverse cryosections of the allantois (Fig. 2A, B, C). As in  
261 PGCLCs, PGCs at E7.25 and E7.75 showed significantly lower levels of nuclear-localized  
262 pSMAD1/5/9 than both neighboring and non-neighboring SOX2- cells within the surrounding  
263 somatic niche (Fig. 2D, E).

264

265 Cells within the allantois showed widespread *Spry4*<sup>H2BVenus</sup> expression (Fig. 2F). However, at  
266 E7.25, PGCs displayed a significantly reduced MAPK response compared to non-PGC  
267 neighbors and non-neighboring SOX2- cells (Fig. 2F, G). By E7.75, this difference was no  
268 longer significant (Fig. 2G). PGCs within the hindgut endoderm displayed a higher MAPK  
269 response than their PGC counterparts within the allantois (Fig. 2G). Moreover, the MAPK  
270 response was higher in endoderm relative to extraembryonic mesoderm (Fig. 2G). Therefore, as

271 PGCs migrate towards the gonads, they enter an environment of higher MAPK signaling  
272 activity.

273  
274 During PGCLC differentiation there was no difference in the WNT response in PGCLCs vs. non-  
275 PGCLCs (Fig. 1L). In contrast, at E7.25 *in vivo*, PGCs expressed higher levels of TCF/Lef:H2B-  
276 GFP than non-adjacent extraembryonic mesoderm cells (Fig. 2H, I), likely a result of the distinct  
277 nature of the *in vitro* and *in vivo* niches. By E7.75, there was no difference in the WNT response  
278 between PGCs and their neighbors. However, migrating PGCs exhibited a stronger WNT  
279 response than non-adjacent endoderm. Thus, both *in vitro* and *in vivo*, PGCs respond to WNT.

280

### 281 **3.3 BMP signaling response is not required for PGCLC specification**

282

283 While BMP is required for PGC specification [15-20], and BMP4 and BMP8a (500 ng/UL) are  
284 exogenously provided during PGCLC differentiation [26], we and others observed that neither  
285 PGCLCs or PGCs exhibit nuclear-localized pSMAD1/5/9 (Fig. 1E, F, 2C, D) [13, 14]. Thus,  
286 either a transient BMP response is required for PGC specification that we do not capture at this  
287 temporal resolution, or BMP is required indirectly by PGCs. To distinguish between these  
288 possibilities, we performed PGCLC differentiation of *Bmpr1a*<sup>-/-</sup> ESCs [25]. *Bmpr1a* is the most  
289 broadly and highly expressed BMP receptor within the pluripotent epiblast during PGC  
290 specification [39] and *Bmpr1a*<sup>-/-</sup> embryos exhibit little or no nuclear pSMAD1/5/9 [40]. In keeping  
291 with this, and as previously observed [25], *Bmpr1a*<sup>-/-</sup> ESCs did not display nuclear-localized  
292 pSMAD1/5/9 under standard serum/LIF culture conditions, although this was observed in  
293 wildtype *Bmpr1a*<sup>+/+</sup> ESCs (Fig. 3A), or when treated with BMP4 for 2 hours (Fig. 3B).  
294 Comparable observations were made with *Bmpr1a*<sup>-/-</sup> EpiLCs (Fig. 3C). We then exposed  
295 *Bmpr1a*<sup>-/-</sup> EpiLCs to PGCLC induction medium and showed that, likewise, *Bmpr1a*<sup>-/-</sup> cell  
296 aggregates do not exhibit nuclear-localized pSMAD1/5/9 under these conditions (Fig. 3D, E).

297

298 Despite this, we observed the specification of cells that expressed AP2γ, as well as SSEA-1 and  
299 CD61 (Fig. 3D, F, G). Notably, *Bmpr1a*<sup>-/-</sup> EpiLCs showed a slightly higher percentage of SSEA-  
300 1+ CD61+ cells than wildtype EpiLCs prior to exposure to PGCLC medium, and accordingly  
301 they displayed an earlier peak in this population during differentiation (Fig. 3G). This finding  
302 suggested that cells with a low BMP response could be predisposed towards a PGCLC fate.  
303 Consistent with this notion, we also noted an inverse correlation between the expression of the  
304 BMP pathway target Inhibitor of differentiation 1 (ID1) and the PGC marker AP2γ in wildtype

305 ESCs (Fig. 3H). To investigate this further, we then mixed equal proportions of *Bmpr1a*<sup>+/+</sup> and  
306 *Bmpr1a*<sup>-/-</sup> EpiLCs, to form chimeric PGCLC aggregates (Fig. 3I). *Bmpr1a*<sup>-/-</sup> ESCs were lineage  
307 labelled with a constitutive GFP reporter that enabled tracking of their eventual fate. In these  
308 experiments, we observed variable proportions of GFP+ cells within the resulting aggregates  
309 (data not shown). In aggregates with a low percentage of GFP+ cells, it was predominantly  
310 *Bmpr1a*<sup>-/-</sup> cells that gave rise to and were immediately adjacent to AP2γ+ PGCLCs (Fig. 3I).  
311 Together these data indicate that a canonical BMP response is not required cell autonomously  
312 for PGCLC differentiation.

313

#### 3144. Discussion

315

316 While many of the signals that direct PGC specification have been elucidated [14, 36, 41], little  
317 is known about how individual PGCs and their niche respond to these signals and whether their  
318 role is cell-autonomous or non-cell-autonomous. BMP is required for PGC development [15-20].  
319 While BMP8b and BMP2 act non-cell autonomously to restrict the development of the anterior  
320 visceral endoderm, a source of PGC inhibitory signals, and to specify the hindgut required for  
321 PGC migration respectively [20, 36], the role of BMP4 is still unclear. Our and other  
322 observations [13, 14] that PGCs do not exhibit a canonical BMP signaling response, suggest  
323 that BMP4 likewise acts non-cell-autonomously or that low-levels of BMP signaling activity, not  
324 detectable following antibody staining, could be sufficient for PGC specification. This is  
325 supported by our finding that BMP signaling defective (*Bmpr1a*<sup>-/-</sup>) ESCs efficiently give rise to  
326 PGCLCs. However, as *Bmpr1a*<sup>-/-</sup> PGCLC differentiation occurred in the absence of wildtype  
327 cells, the requirement for BMP is not via BMP-responsive cells within the niche and may instead  
328 be through non-canonical SMAD-independent downstream pathways [42, 43]. Alternatively, as  
329 perturbation of BMP signaling *in vivo* causes the epiblast to prematurely adopt a neural identity  
330 [25], it may be required to initially maintain the epiblast in a PGC competent state rather than  
331 directly regulating PGC specification. This role may not be masked *in vitro* as ESCs are forcibly  
332 maintained in a self-renewing state using 2i small molecule inhibitors.

333

334 MAPK inhibition promotes PGC differentiation *in vitro* [44]. Additionally, treating isolated PGCs  
335 with FGF reprograms them to a state of pluripotency [45]. Thus, FGF/MAPK signaling is  
336 associated with a block to the formation, or destabilization, of a PGC identity. In keeping with  
337 this, we observed that early PGCs, at E7.25, showed a lower MAPK response than somatic  
338 cells. Although we observed low-level *Spry4*<sup>H2BVenus</sup> expression within PGCs and PGCLCs,

339 indicating that MAPK signaling may not be entirely shut down, this could also represent  
340 perdurance of the Venus reporter. Therefore, future studies using dynamic ERK biosensors [46,  
341 47], combined with time-lapse imaging [48], will uncover precise signaling dynamics. We also  
342 observed that the MAPK response was elevated in PGCs within the hindgut endoderm,  
343 consistent with studies showing that FGF plays a role in germ cell migration [45, 49]. This is at  
344 odds with reports that migrating PGCs are devoid of phosphorylated ERK, a component of the  
345 MAPK pathway [8]. Therefore, *Spry4* expression within the endoderm may also be regulated by  
346 additional signaling inputs, such as WNT [50].

347  
348 PGCs are specified in a signaling environment that instructs the majority of cells to adopt a  
349 somatic non-PGC identity. One way that they might maintain their unique identity is via  
350 regulatory mechanisms that prevent them from detecting or responding to these signals.  
351 Nevertheless, while PGCs displayed a reduced BMP and MAPK response, they did respond to  
352 WNT. Hence, in the absence of robust BMP and MAPK responses, WNT is not sufficient to  
353 drive somatic differentiation. Previous studies reported that, after an initial period of WNT  
354 signaling, WNT targets must be suppressed to mediate PGC differentiation [37]. Consistent with  
355 this, we observed a rapid decrease in the WNT signaling response over time during PGCLC  
356 differentiation. However, PGCs and somatic cells showed comparable levels of TCF/Lef:H2B-  
357 GFP expression suggesting that there is not a global PGC-specific reduction in the signaling  
358 response. Thus, this regulation likely occurs via locus-specific mechanisms [37]. Of cells within  
359 the allantois, PGCs exhibit the strongest WNT response, followed by their immediate somatic  
360 neighbors, while non-neighboring somatic cells were the least responsive. Therefore, PGCs  
361 could perhaps act as a source of WNT that activates autocrine and paracrine signaling in  
362 adjacent, but not more distant cells.

363  
364 Here we have shown that PGC-specific signaling responses exist for a number of different  
365 pathways. However, while we observed significant differences in MAPK and WNT signaling  
366 responses in PGCs vs. somatic cells within the allantois, these were not evident in PGCLC  
367 aggregates. This presumably reflects the difference between the PGC niche in the embryo and  
368 during stem cell differentiation, highlighting the importance of side by side comparisons of *in*  
369 *vitro* and *in vivo* developmental mechanisms. Furthermore, the important question remains as to  
370 how these distinct PGCs and soma responses are regulated. Current single-cell transcriptomic  
371 studies of mouse embryos contain only a small number of PGCs with no spatial information,  
372 thereby prohibiting clear conclusions on the relative expression of signaling pathway

373 components within these cells versus their immediate neighbors and cells within their further  
374 proximity. Future PGC-enriched single-cell spatial transcriptomic studies may shed light on this.  
375 However, as signaling responses are largely regulated at a post-transcriptional level, advances  
376 in single-cell proteomic techniques or the use of quantitative time and space resolved reporters  
377 as dynamic signaling readouts may be necessary to fully answer these open questions.

378

### 379 **Acknowledgements**

380

381 We thank members of the Hadjantonakis lab for critical discussions and comments on the  
382 manuscript. We also thank members of MSKCC's Flow Cytometry Core facility, funded by the  
383 NCI Cancer Center Support Grant (CCSG, P30 CA08748). Additionally, we thank Tristan  
384 Rodriguez for providing the *Bmpr1a*<sup>-/-</sup> ESCs used within this study. SMM was supported by a  
385 Wellcome Trust Sir Henry Wellcome postdoctoral fellowship under the supervision of AKH.  
386 Work in the Hadjantonakis lab was supported by grants from the NIH (R01HD094868,  
387 R01DK084391 and P30CA008748).

388

### 389 **Ethics**

390 Animal experimentation: Animal experimentation: All mice used in this study were maintained in  
391 accordance with the guidelines of the Memorial Sloan Kettering Cancer Center (MSKCC)  
392 Institutional Animal Care and Use Committee (IACUC) under protocol number 03-12-017 (PI  
393 Hadjantonakis).

394

395

## 3965. References

397

- 398 1. Pierce, J.L., A.L. Frazier, and J.F. Amatruda, *Pediatric Germ Cell Tumors: A Developmental*  
399 *Perspective*. Advances in Urology, 2018. **2018**.
- 400 2. Stevens, L.C., *The biology of teratomas*. Adv Morphog, 1967. **6**: p. 1-31.
- 401 3. Stevens, L.C., *Teratocarcinogenesis and spontaneous parthenogenesis in mice*. Results  
402 *Probl Cell Differ*, 1980. **11**: p. 265-74.
- 403 4. Giuliano, C.J., S.J. Freemantle, and M.J. Spinella, *Testicular Germ Cell Tumors: A*  
404 *Paradigm for the Successful Treatment of Solid Tumor Stem Cells*. Curr Cancer Ther Rev,  
405 2006. **2**(3): p. 255-270.
- 406 5. Morgani, S.M. and A.K. Hadjantonakis, *Signaling regulation during gastrulation: Insights*  
407 *from mouse embryos and in vitro systems*. Gradients and Tissue Patterning, 2020. **137**:  
408 p. 391-431.
- 409 6. Magnusdottir, E., et al., *A tripartite transcription factor network regulates primordial*  
410 *germ cell specification in mice*. Nature Cell Biology, 2013. **15**(8): p. 905-U322.
- 411 7. Ohinata, Y., et al., *Blimp1 is a critical determinant of the germ cell lineage in mice*.  
412 *Nature*, 2005. **436**(7048): p. 207-213.
- 413 8. Grabole, N., et al., *Prdm14 promotes germline fate and naive pluripotency by repressing*  
414 *FGF signalling and DNA methylation*. EMBO Rep, 2013. **14**(7): p. 629-37.
- 415 9. Irie, N., W.W. Tang, and M. Azim Surani, *Germ cell specification and pluripotency in*  
416 *mammals: a perspective from early embryogenesis*. Reprod Med Biol, 2014. **13**(4): p.  
417 203-215.
- 418 10. Matsui, Y., K. Zsebo, and B.L.M. Hogan, *Derivation of Pluripotential Embryonic Stem-Cells*  
419 *from Murine Primordial Germ-Cells in Culture*. Cell, 1992. **70**(5): p. 841-847.
- 420 11. Resnick, J.L., et al., *Long-Term Proliferation of Mouse Primordial Germ-Cells in Culture*.  
421 *Nature*, 1992. **359**(6395): p. 550-551.
- 422 12. Johnson, A.D. and R. Alberio, *Primordial germ cells: the first cell lineage or the last cells*  
423 *standing?* Development, 2015. **142**(16): p. 2730-2739.
- 424 13. Dudley, B.M., et al., *BMP signaling regulates PGC numbers and motility in organ culture*.  
425 *Mechanisms of Development*, 2007. **124**(1): p. 68-77.
- 426 14. Senft, A.D., et al., *Genetic dissection of Nodal and Bmp signalling requirements during*  
427 *primordial germ cell development in mouse*. Nature Communications, 2019. **10**.
- 428 15. Chang, H. and M.M. Matzuk, *Smad5 is required for mouse primordial germ cell*  
429 *development*. Mechanisms of Development, 2001. **104**(1-2): p. 61-67.
- 430 16. Hayashi, K., et al., *SMAD1 signaling is critical for initial commitment of germ cell lineage*  
431 *from mouse epiblast*. Mechanisms of Development, 2002. **118**(1-2): p. 99-109.
- 432 17. Lawson, K.A., et al., *Bmp4 is required for the generation of primordial germ cells in the*  
433 *mouse embryo*. Genes & Development, 1999. **13**(4): p. 424-436.
- 434 18. Tremblay, K.D., N.R. Dunn, and E.J. Robertson, *Mouse embryos lacking Smad1 signals*  
435 *display defects in extra-embryonic tissues and germ cell formation*. Development, 2001.  
436 **128**(18): p. 3609-3621.
- 437 19. Ying, Y., et al., *Requirement of Bmp8b for the generation of primordial germ cells in the*  
438 *mouse*. Molecular Endocrinology, 2000. **14**(7): p. 1053-1063.

- 439 20. Ying, Y. and G.Q. Zhao, *Cooperation of endoderm-derived BMP2 and extraembryonic*  
440 *ectoderm-derived BMP4 in primordial germ cell generation in the mouse*. *Developmental*  
441 *Biology*, 2001. **232**(2): p. 484-492.
- 442 21. Morgani, S.M., et al., *Micropattern differentiation of mouse pluripotent stem cells*  
443 *recapitulates embryo regionalized cell fate patterning*. *Elife*, 2018. **7**.
- 444 22. Hooper, M., et al., *HPRT-deficient (Lesch-Nyhan) mouse embryos derived from germline*  
445 *colonization by cultured cells*. *Nature*, 1987. **326**(6110): p. 292-5.
- 446 23. Ferrer-Vaquero, A., et al., *A sensitive and bright single-cell resolution live imaging reporter*  
447 *of Wnt/ss-catenin signaling in the mouse*. *BMC Dev Biol*, 2010. **10**: p. 121.
- 448 24. Morgani, S.M., et al., *A Sprouty4 reporter to monitor FGF/ERK signaling activity in ESCs*  
449 *and mice*. *Developmental Biology*, 2018. **441**(1): p. 104-126.
- 450 25. Di-Gregorio, A., et al., *BMP signalling inhibits premature neural differentiation in the*  
451 *mouse embryo*. *Development*, 2007. **134**(18): p. 3359-3369.
- 452 26. Hayashi, K., et al., *Reconstitution of the mouse germ cell specification pathway in culture*  
453 *by pluripotent stem cells*. *Cell*, 2011. **146**(4): p. 519-32.
- 454 27. Saiz, N., et al., *Asynchronous fate decisions by single cells collectively ensure consistent*  
455 *lineage composition in the mouse blastocyst*. *Nature Communications*, 2016. **7**.
- 456 28. Hayashi, K. and M. Saitou, *Stepwise Differentiation from Naive State Pluripotent Stem*  
457 *Cells to Functional Primordial Germ Cells Through an Epiblast-Like State*. *Epiblast Stem*  
458 *Cells: Methods and Protocols*, 2013. **1074**: p. 175-183.
- 459 29. Yamaguchi, T.P., et al., *Fgfr-1 Is Required for Embryonic Growth and Mesodermal*  
460 *Patterning during Mouse Gastrulation*. *Genes & Development*, 1994. **8**(24): p. 3032-  
461 3044.
- 462 30. Ciruna, B. and J. Rossant, *FGF signaling regulates mesoderm cell fate specification and*  
463 *morphogenetic movement at the primitive streak*. *Developmental Cell*, 2001. **1**(1): p. 37-  
464 49.
- 465 31. Deng, C.X., et al., *Murine Fgfr-1 Is Required for Early Postimplantation Growth and Axial*  
466 *Organization*. *Genes & Development*, 1994. **8**(24): p. 3045-3057.
- 467 32. Barrow, J.R., et al., *Wnt3 signaling in the epiblast is required for proper orientation of the*  
468 *anteroposterior axis*. *Developmental Biology*, 2007. **312**(1): p. 312-320.
- 469 33. Liu, P.T., et al., *Requirement for Wnt3 in vertebrate axis formation*. *Nature Genetics*,  
470 1999. **22**(4): p. 361-365.
- 471 34. Haegel, H., et al., *Lack of beta-catenin affects mouse development at gastrulation*.  
472 *Development*, 1995. **121**(11): p. 3529-37.
- 473 35. Kelly, O.G., K.I. Pinson, and W.C. Skarnes, *The Wnt co-receptors Lrp5 and Lrp6 are*  
474 *essential for gastrulation in mice*. *Development*, 2004. **131**(12): p. 2803-2815.
- 475 36. Ohinata, Y., et al., *A Signaling Principle for the Specification of the Germ Cell Lineage in*  
476 *Mice*. *Cell*, 2009. **137**(3): p. 571-584.
- 477 37. Aramaki, S., et al., *A Mesodermal Factor, T, Specifies Mouse Germ Cell Fate by Directly*  
478 *Activating Germline Determinants*. *Developmental Cell*, 2013. **27**(5): p. 516-529.
- 479 38. Ginsburg, M., M.H.L. Snow, and A. McLaren, *Primordial Germ-Cells in the Mouse Embryo*  
480 *during Gastrulation*. *Development*, 1990. **110**(2): p. 521-&.
- 481 39. Pijuan-Sala, B., et al., *A single-cell molecular map of mouse gastrulation and early*  
482 *organogenesis*. *Nature*, 2019. **566**(7745): p. 490-+.

- 483 40. Mishina, Y., et al., *Bmpr encodes a type I bone morphogenetic protein receptor that is*  
484 *essential for gastrulation during mouse embryogenesis*. *Genes & Development*, 1995.  
485 **9**(24): p. 3027-3037.
- 486 41. Saitou, M. and M. Yamaji, *Germ cell specification in mice: signaling, transcription*  
487 *regulation, and epigenetic consequences*. *Reproduction*, 2010. **139**(6): p. 931-942.
- 488 42. Derynck, R. and Y.E. Zhang, *Smad-dependent and Smad-independent pathways in TGF-*  
489 *beta family signalling*. *Nature*, 2003. **425**(6958): p. 577-84.
- 490 43. Zhang, Y.E., *Non-Smad pathways in TGF-beta signaling*. *Cell Res*, 2009. **19**(1): p. 128-39.
- 491 44. Kimura, T., et al., *Induction of Primordial Germ Cell-Like Cells From Mouse Embryonic*  
492 *Stem Cells by ERK Signal Inhibition*. *Stem Cells*, 2014. **32**(10): p. 2668-2678.
- 493 45. Chang, C.T., et al., *Cell-intrinsic Fgf signaling contributes to primordial germ cell homing*  
494 *in zebrafish*. *Theriogenology*, 2020. **158**: p. 424-431.
- 495 46. Pokrass, M.J., et al., *Cell-Cycle-Dependent ERK Signaling Dynamics Direct Fate*  
496 *Specification in the Mammalian Preimplantation Embryo*. *Developmental Cell*, 2020.  
497 **55**(3): p. 328-+.
- 498 47. Simon, C.S., et al., *Live Visualization of ERK Activity in the Mouse Blastocyst Reveals*  
499 *Lineage-Specific Signaling Dynamics*. *Developmental Cell*, 2020. **55**(3): p. 341-+.
- 500 48. McDole, K., et al., *In Toto Imaging and Reconstruction of Post-Implantation Mouse*  
501 *Development at the Single-Cell Level*. *Cell*, 2018. **175**(3): p. 859-876 e33.
- 502 49. Takeuchi, Y., et al., *The roles of FGF signaling in germ cell migration in the mouse*.  
503 *Development*, 2005. **132**(24): p. 5399-409.
- 504 50. Katoh, Y. and M. Katoh, *FGF signaling inhibitor, SPRY4, is evolutionarily conserved target*  
505 *of WNT signaling pathway in progenitor cells*. *International Journal of Molecular*  
506 *Medicine*, 2006. **17**(3): p. 529-532.  
5076.
- 508
- 509
- 510



511 **Figure Legends**

512

513 **Figure 1. Quantitative analysis of signaling responses during PGCLC differentiation. A.**

514 Schematic diagram depicting the PGCLC differentiation protocol as previously described [26].

515 **B.** Confocal maximum intensity projection of an aggregate of cells at Day 2 (D2) of PGCLC

516 differentiation. Scale bars, 100  $\mu$ m. **C.** Representative flow cytometry data of embryonic stem

517 cells during PGCLC differentiation. SSEA-1 and CD61 double positive cells mark PGCLCs. **D.**

518 Percentage of SSEA-1+ CD61+ PGCLCs over time during PGCLC differentiation. Each point

519 represents an independent experiment (n = 6) performed with 4 distinct cell lines. Data

520 represented as median and interquartile range. **E, G, J.** Confocal maximum intensity projections

521 of PGCLC aggregates at day 2, 4, and 6 of differentiation. Scale bars, 100  $\mu$ m. **E.** Aggregates

522 were immunostained for and AP2 $\gamma$  to mark PGCLCs and phosphorylated SMAD1/5/9 (pS1/5/9),

523 a readout of the BMP signaling response. **G.** PGLC differentiation of *Spry4*<sup>H2BVenus</sup> reporter

524 embryonic stem cell lines, that act as a read out of FGF/MAPK signaling activity. **J.** PGLC

525 differentiation of TCF/Lef:H2B-GFP reporter embryonic stem cell lines, which act as a read out

526 of WNT signaling activity. **F, I, L.** Quantitative immunofluorescence analysis of signaling

527 responses, measured in arbitrary units (a.u.), in PGCLCs (AP2 $\gamma$ +) and non-PGCLCs (AP2 $\gamma$ -) in

528 3 distinct cell aggregates per time point per cell line. Each point represents a single cell. Data

529 shown as median and interquartile range. Statistical analysis of significance was assessed on

530 log-normalized data using Student's *t*-test, performed on the average fluorescence level in each

531 aggregate. **H, K.** Relative *Spry4*<sup>H2BVenus</sup> (H) and TCF/Lef:H2B-GFP (K) fluorescence levels in

532 arbitrary units (a.u.) analyzed by flow cytometry in SSEA-1+ CD61+ PGCLCs, and SSEA-1-

533 CD61+, SSEA-1+ CD61- and SSEA-1 CD61- non-PGCLC populations. Data represented as

534 mean and standard deviation and shown relative to the mean fluorescence across all

535 populations at day 0 of differentiation, n = 3 independent experiments.

536

537 **Figure 2. Quantitative analysis of signaling responses during PGC specification *in vivo*.**

538 **A.** (i) Sagittal confocal optical section of an immunostained embryonic day (E) 7.25 embryo.

539 Scale bar, 100  $\mu$ m. Dashed line indicates the plane of transverse section shown in adjacent

540 panel. (ii) Confocal optical section of a transverse cryosection through the allantois of an E7.25

541 embryo. Scale bar, 25  $\mu$ m. Box demarcates the region shown in higher magnification in lower

542 panels. AP2 $\gamma$  immunostaining exhibits high levels of non-specific background staining within the

543 endoderm. **B.** For quantitative analysis of signaling responses, cells adjacent to PGCs

544 (pseudocolored in yellow) were categorized as PGC 'Neighbors' and non-adjacent cells within

545 the allantois (pseudocolored in blue) were categorized as 'Other'. **C.** Quantification of levels of  
546 SOX2 in arbitrary units (a.u.) PGCs, PGC Neighbors and Other cells within the allantois of  
547 E7.25 embryos. SOX2+ immunostaining was used to define the PGC population. Statistical  
548 analysis of significance was assessed using Student's *t*-test and performed on the average  
549 fluorescence level in each embryo (n = 3 embryos, number of individual cells shown on graph).  
550 Each point represents a single cell. Data shown relative to the average mean fluorescence in  
551 'Other', non-PGCs and represented as the median and interquartile range. **D, F, H.** Sagittal  
552 confocal maximum intensity projections (left panels, scale bars, 100  $\mu$ m) and confocal optical  
553 sections of transverse cryosection through the allantois of E7.25 and E7.75 embryos (scale  
554 bars, 25  $\mu$ m). Dashed line approximately demarcates the boundary between the allantois and  
555 the endoderm. **D.** Embryos were immunostained for phosphorylated SMAD1/5/9 as a readout of  
556 BMP signaling activity. **F.** Transgenic *Spry4*<sup>H2BVenus</sup> reporter embryos were used to read out  
557 FGF/MAPK signaling activity. **H.** TCF/Lef:H2B-GFP reporter embryos were used to read out  
558 WNT signaling activity. **E, G, I.** Quantification of levels of nuclear SMAD1/5/9, *Spry4*<sup>H2BVenus</sup>, and  
559 TCF/Lef:H2B-GFP expression in arbitrary units (a.u.) in PGCs, PGC Neighbors and Other cells  
560 within the allantois of E7.25 and E7.75 embryos. In E7.25 embryos, all PGCs were within the  
561 allantois. In E7.75 embryos, a fraction of PGCs had also begun to migrate along the hindgut  
562 endoderm hence we separately investigated signaling responses in PGCs within the allantois  
563 and within the endoderm for this analysis. Statistical analysis of significance was assessed  
564 using Student's *t*-test and performed on the average fluorescence level in each embryo (n = 3  
565 embryos, number of individual cells shown on graph). Each point represents a single cell. Data  
566 shown relative to the average mean fluorescence in 'Other', non-PGCs and represented as the  
567 median and interquartile range. Pr, proximal; Ds, distal; A, anterior; P, posterior; L, left; R, right;  
568 Epi, epiblast; PS, primitive streak; End, endoderm.

569

570 **Figure 3. Cell autonomous BMP signaling response is not necessary for PGCLC fate. A.**  
571 Confocal optical sections of wildtype (*Bmpr1a*<sup>+/+</sup>) and *Bmpr1a*<sup>-/-</sup> embryonic stem cells (ESCs)  
572 immunostained for pSMAD1/5/9 (pS1/5/9) after culture under standard or after 2 hours  
573 treatment with 50 ng/ml BMP4. **B, C.** Quantification of pSMAD1/5/9 levels in wildtype and  
574 *Bmpr1a*<sup>-/-</sup> embryonic stem cells ESCs (from 5 distinct fields of view) and EpiLCs (from 5 distinct  
575 fields of view). Each point represents a single cell. Data represented as median and interquartile  
576 range. Statistical analysis of significance was assessed using Student's *t*-test, performed on the  
577 average fluorescence level in each field. n=2 experimental replicates. **D.** Confocal maximum  
578 intensity projection of wildtype and *Bmpr1a*<sup>-/-</sup> cell aggregates at Day 2 (D2) of PGCLC

579 differentiation. Scale bars, 100  $\mu\text{m}$ . **E.** Quantification of pSMAD1/5/9 levels in wildtype and  
580 *Bmpr1a*<sup>-/-</sup> PGCLC aggregates. Each point represents a single cell. Data represented as median  
581 and interquartile range. Statistical analysis of significance was assessed using Student's *t*-test  
582 and performed on the average fluorescence level in each aggregate (n = 3 aggregates). **F.** Flow  
583 cytometry analysis of wildtype and *Bmpr1a*<sup>-/-</sup> cell aggregates at Day 2 of PGCLC differentiation.  
584 SSEA-1+ CD61+ cells represent PGCLCs. **G.** Percentage of SSEA-1+ CD61+ PGCLCs during  
585 wildtype and *Bmpr1a*<sup>-/-</sup> PGCLC differentiation. Each point represents an independent  
586 experiment (n = 3). Data represented as median and interquartile range. **H.** Confocal optical  
587 section of ESCs, cultured in serum and LIF, immunostained for the BMP pathway target, ID1  
588 and the PGC marker AP2 $\gamma$  (left panel). Scale bar, 25  $\mu\text{m}$ . Right panel shows quantification of  
589 ID1 and AP2 $\gamma$  levels in arbitrary units (a.u.) in individual cells. Quantification performed on  
590 images from 5 randomly selected regions. Each point represents a single cell. Linear regression  
591 and correlation coefficient analysis were performed and were statistically significant ( $p < 0.0001$ ).  
592 Correlation coefficient is shown on graph. **I.** Wildtype and *Bmpr1a*<sup>-/-</sup> EpiLCs were mixed  
593 together in equal ratios to form PGCLC aggregates. *Bmpr1a*<sup>-/-</sup> cells were labelled with a  
594 constitutive GFP lineage marker. Images show Confocal maximum intensity projections of  
595 PGCLC aggregates at day 2, 4, and 6 of differentiation. Scale bars, 100  $\mu\text{m}$ .  
596

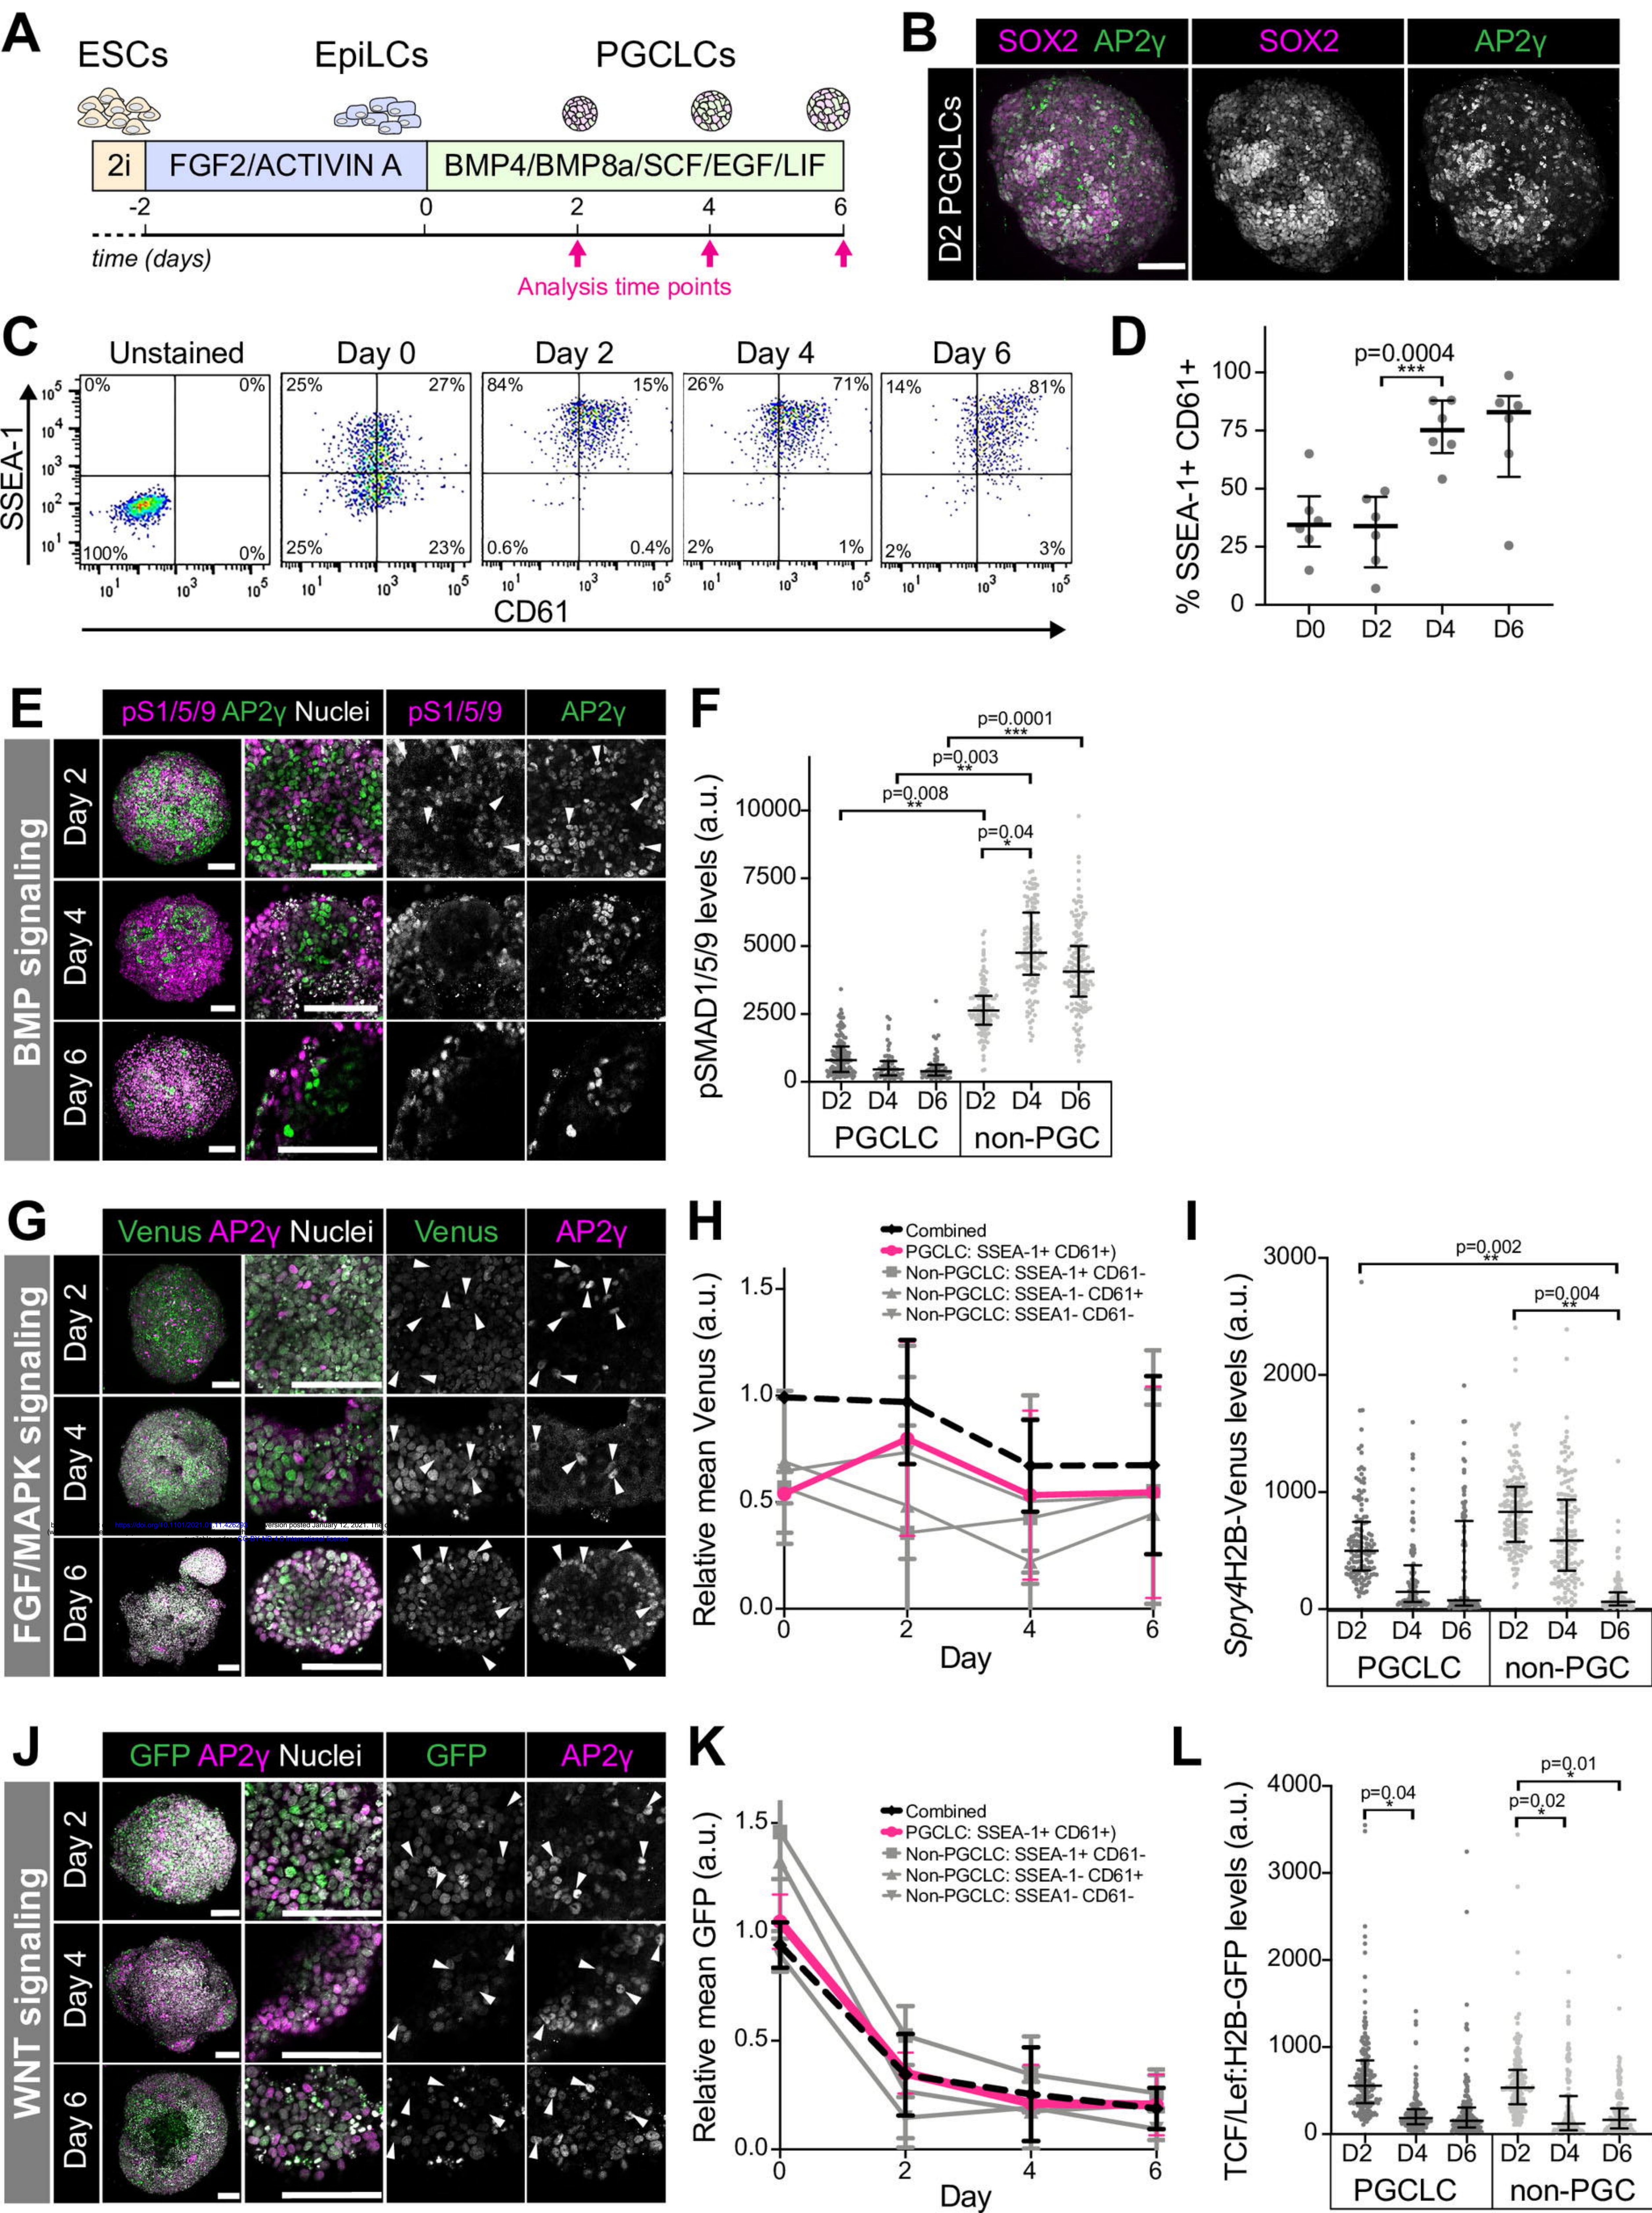

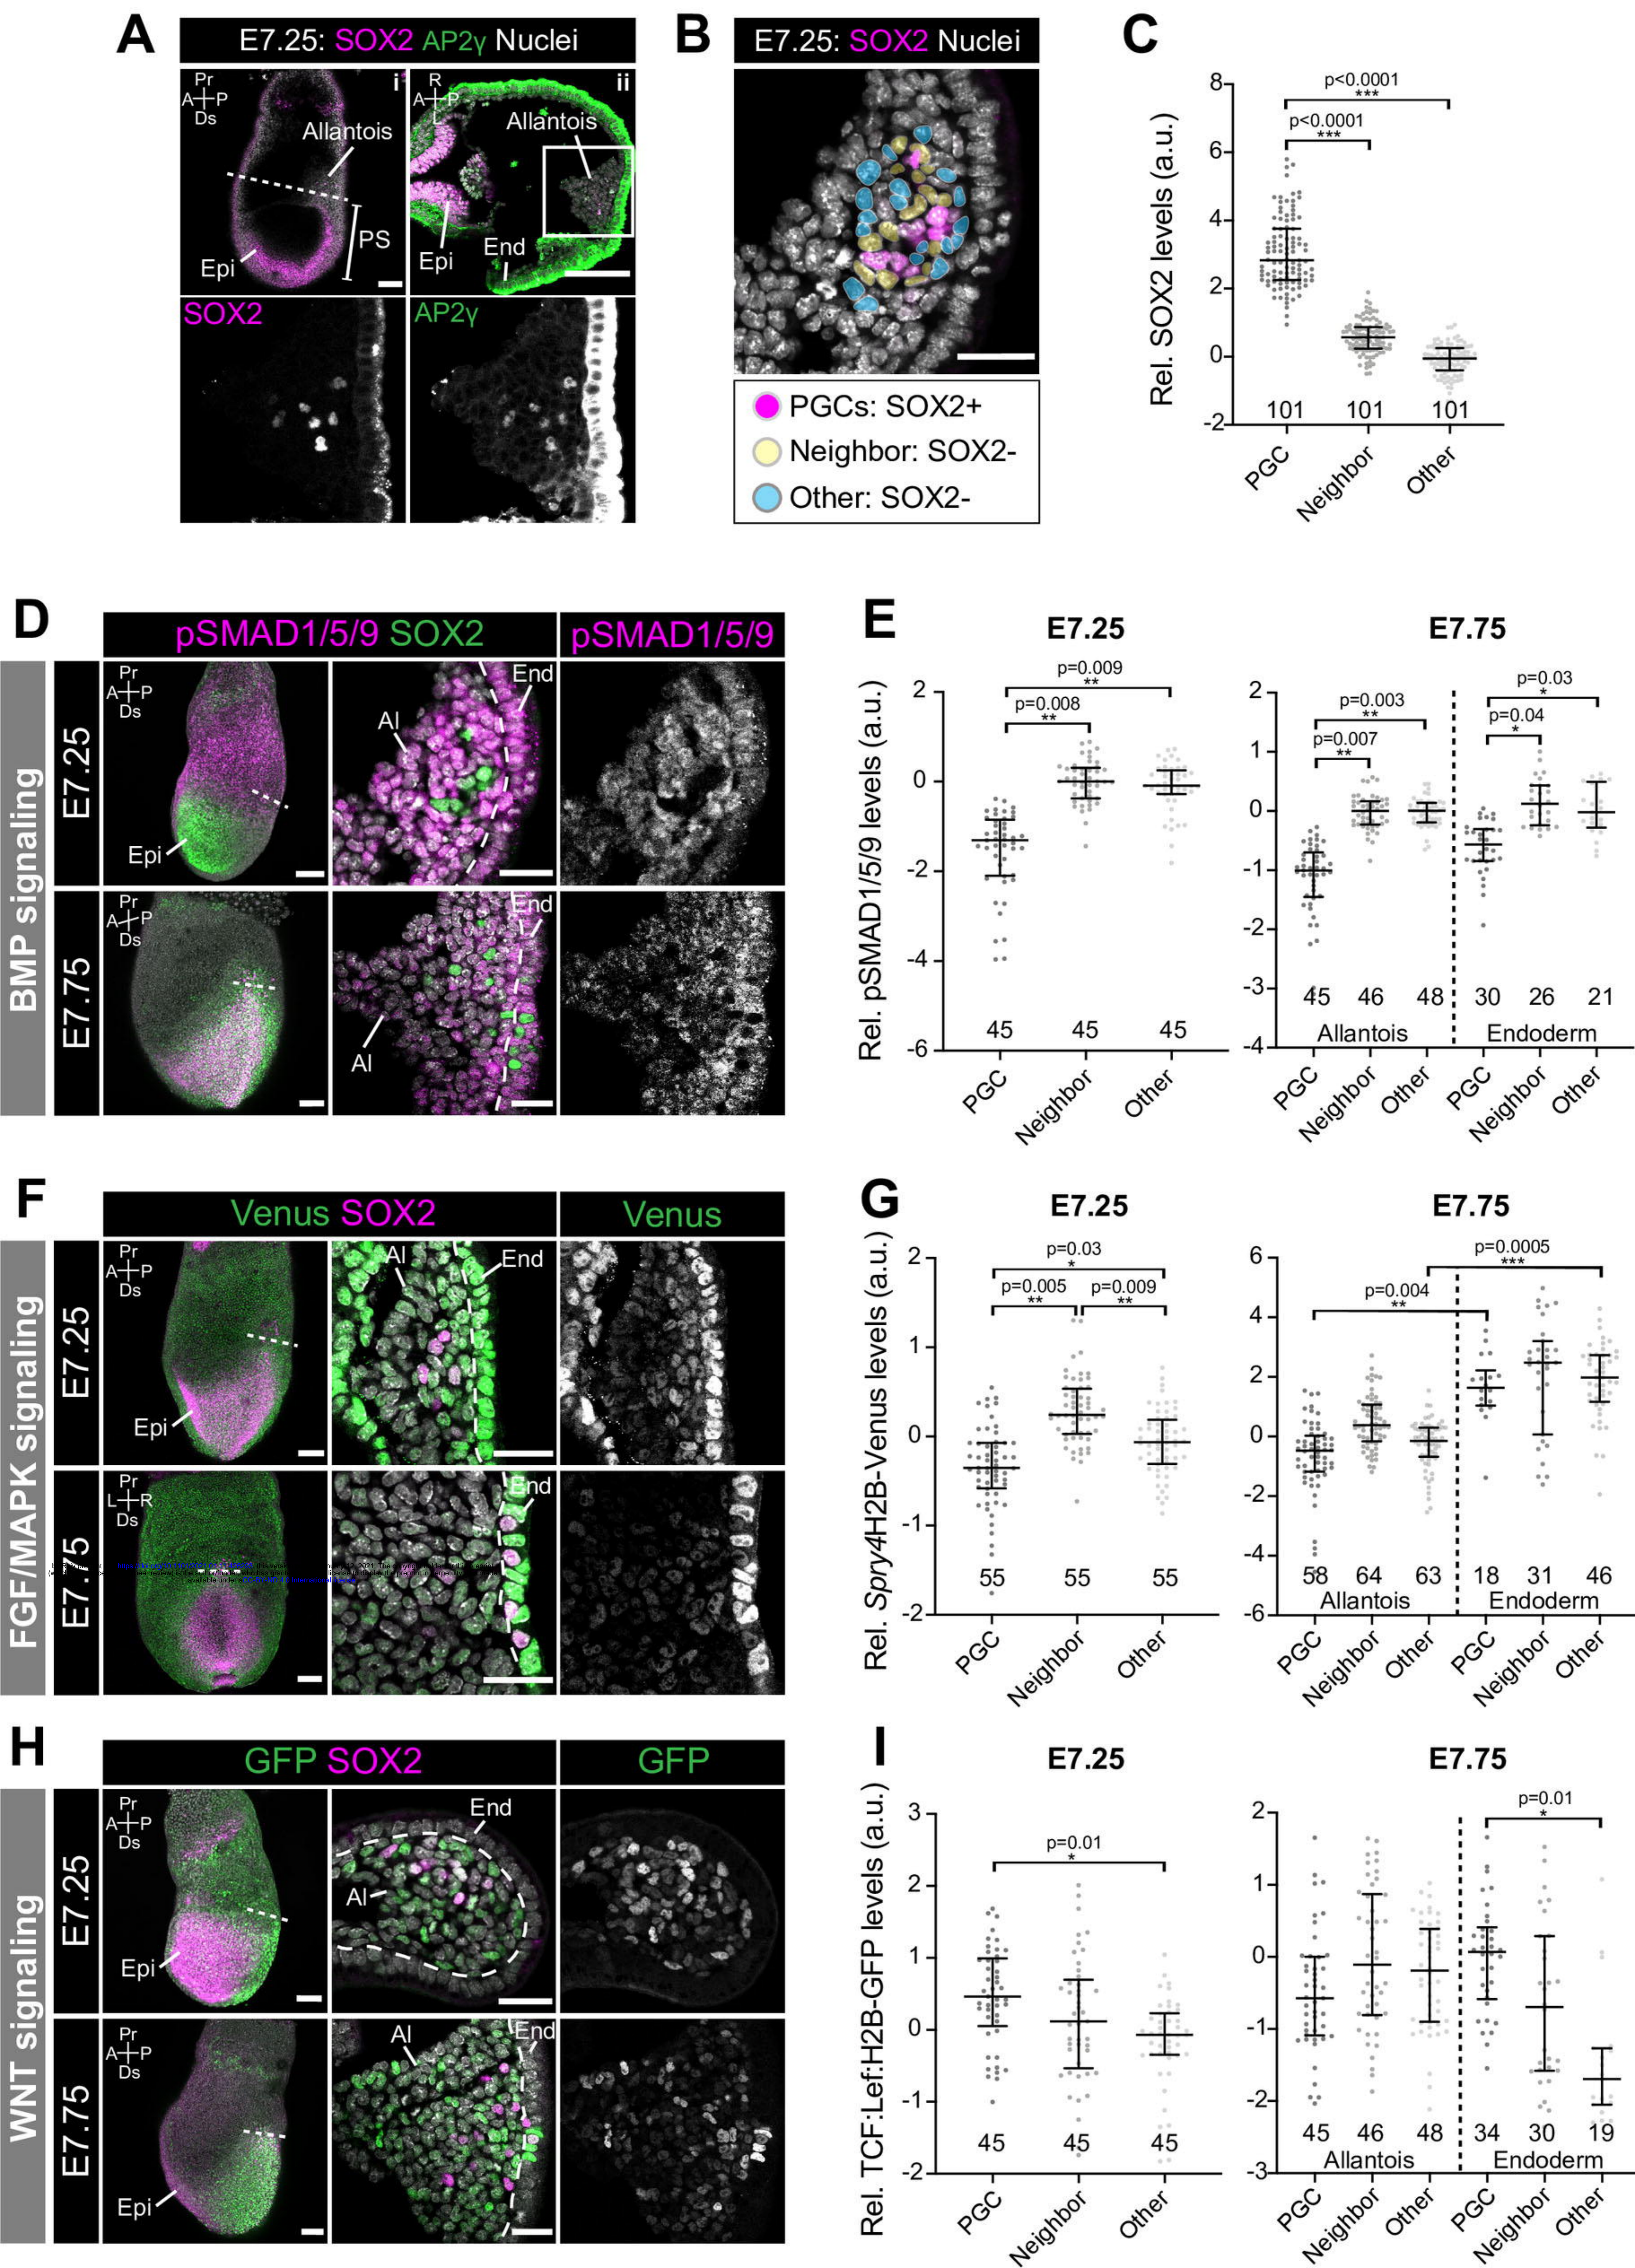

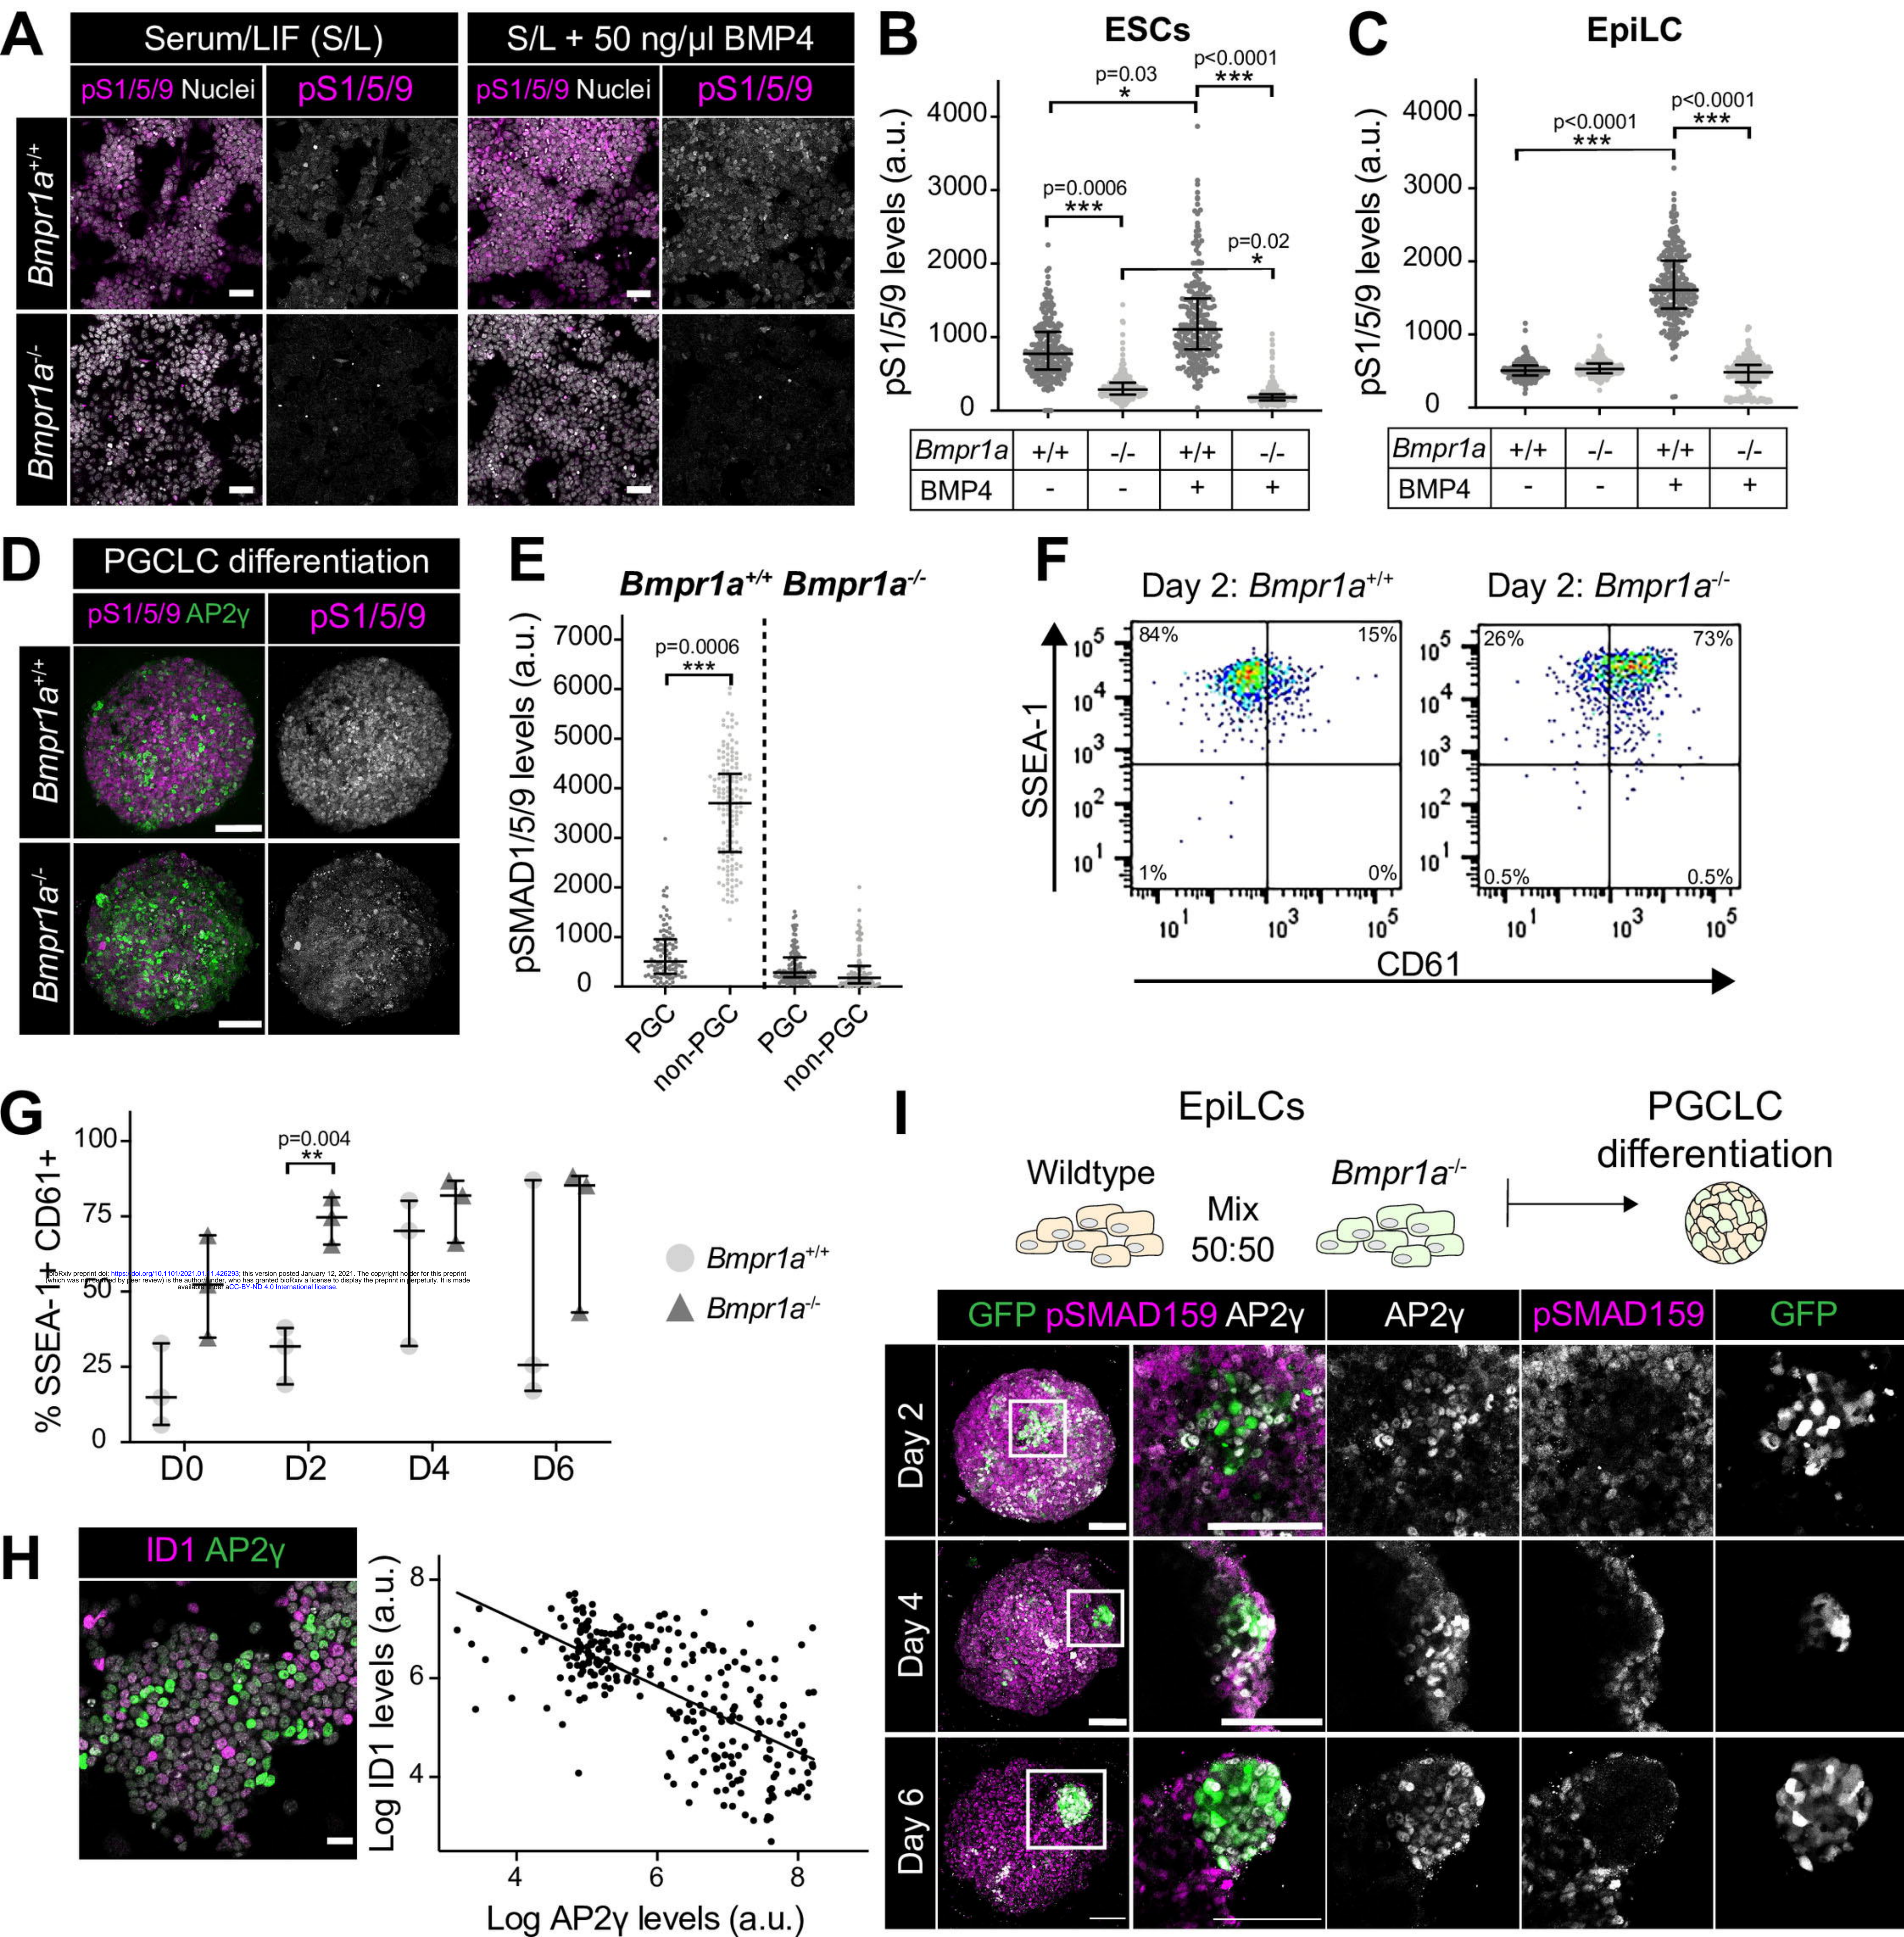

Source: https://www.biorxiv.org/content/10.1101/2021.01.11.426293v1.full.pdf
